# Supplementary material for: Transgenerational Adaptation of Arabidopsis to Stress Requires DNA Methylation and the Function of Dicer-Like Proteins
Source: PLoS One. 2010 Mar 3;5(3):e9514. doi: 10.1371/journal.pone.0009514 (PMC2831073; doi:10.1371/journal.pone.0009514)
Supplement: Table S1 — Data are shown as the average recombination frequency in G0, S1, S2 and S1C1 plants stemming from exposure to drought, flood, heat, cold and UVC or propagated at non-induced conditions (control line 11 and control line 15d8). (0.04 MB DOC) [file pone.0009514.s006.doc]

|  | G0 | S1 | S2 | S1C1 |
| --- | --- | --- | --- | --- |
| Control line 11 | 0.360.022 | 0.350.092 | 0.290.033 | 0.290.033 |
| 25 mM NaCl | 0.840.19 | 0.760.091 | 0.670.049 | 0.430.041 |
| 75 mM NaCl | 1.260.22 | 0.490.074 | 0.460.093 | 0.330.046 |
|  |  |  |  |  |
| Control line 15d8 | 3.720.31 | 3.520.44 | 3.690.28 | 3.690.19 |
| Drought | 2.200.12 | 2.640.21 | 2.660.11 | 3.760.52 |
| Flood | 8.312.1 | 6.690.69 | 6.640.39 | 4.800.25 |
| Heat | 7.890.9 | 6.120.74 | 9.151.12 | 5.200.73 |
| Cold | 5.780.4 | 4.220.88 | 6.130.55 | 4.210.19 |
| UVC | 18.532.8 | 9.491.33 | 12.582.2 | 5.720.68 |

**Table S1. HRF in line 11 and line 15d8 exposed to stress**
